# Supplementary material
Source: publisher site journal article supplement (https://www.dovepress.com/article/231846)
Supplement: Supplementary file 1 [file get_supplementary_file.php]

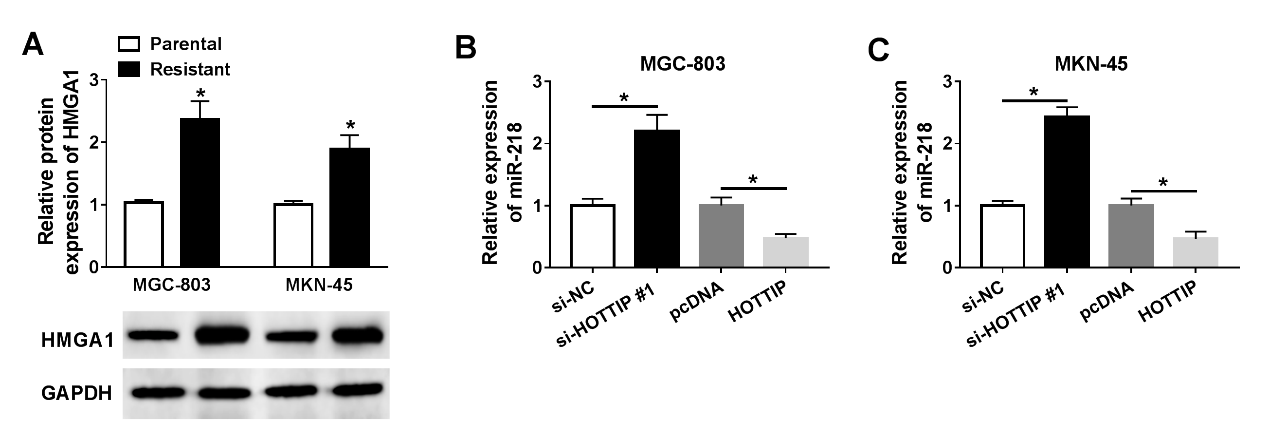


**Supplemental Figure 1. HMGA1 expression was increased in resistant cells, and miR-218 expression was negatively by HOTTIP.** (A) The expression of HMGA1 was determined in cisplatin-resistant and -sensitive GC cells by qRT-PCR. (B and C) The expression of miR-218 was measured by RT-PCR in MGC-803 and MKN cells transfected with si-NC, si-HOTTIP#1, pcDNA, or HOTTIP. **P*<0.05.
